# Supplementary material for: Peculiarities of aminoacyl-tRNA synthetases from trypanosomatids
Source: PubMed Central journal article supplement (PMC8319005; doi:10.1016/j.jbc.2021.100913), 2021-06-25
Supplement: mmc1.pdf [file mmc1.pdf]

**Supporting Figure S1. List of organisms available in the tritrypDB (<https://tritrypdb.org/>)**

|                           | Taxonomy ID |
|---------------------------|-------------|
| <b><u>Leishmania</u></b>  |             |
| <i>L. aethiopica</i>      | 5667        |
| <i>L. amazonensis</i>     | 5659        |
| <i>L. arabica</i>         | 40284       |
| <i>L. braziliensis</i>    | 5660        |
| <i>L. donovani</i>        | 5661        |
| <i>L. enriettii</i>       | 5663        |
| <i>L. gerbilli</i>        | 40285       |
| <i>L. infantum</i>        | 5671        |
| <i>L. major</i>           | 5664        |
| <i>L. mexicana</i>        | 5665        |
| <i>L. panamensis</i>      | 5679        |
| <i>L. tarentolae</i>      | 5689        |
| <i>L. tropica</i>         | 5666        |
| <i>L. turanica</i>        | 62297       |
| <b><u>Trypanosoma</u></b> |             |
| <i>T. brucei</i>          | 5691        |
| <i>T. congolense</i>      | 5692        |
| <i>T. cruzi</i>           | 5693        |
| <i>T. evansi</i>          | 5697        |
| <i>T. grayi</i>           | 71804       |
| <i>T. rangeli</i>         | 5698        |
| <i>T. theileri</i>        | 67003       |
| <i>T. vivax</i>           | 5699        |

**Supporting Figure S2. Radial representation of unrooted phylogenetic trees.** The trees are built using the FastME program (32). Sequences in yellow, blue and red are from bacteria, archaea, and eukaryotes (cytosolic or mitochondrial), respectively.

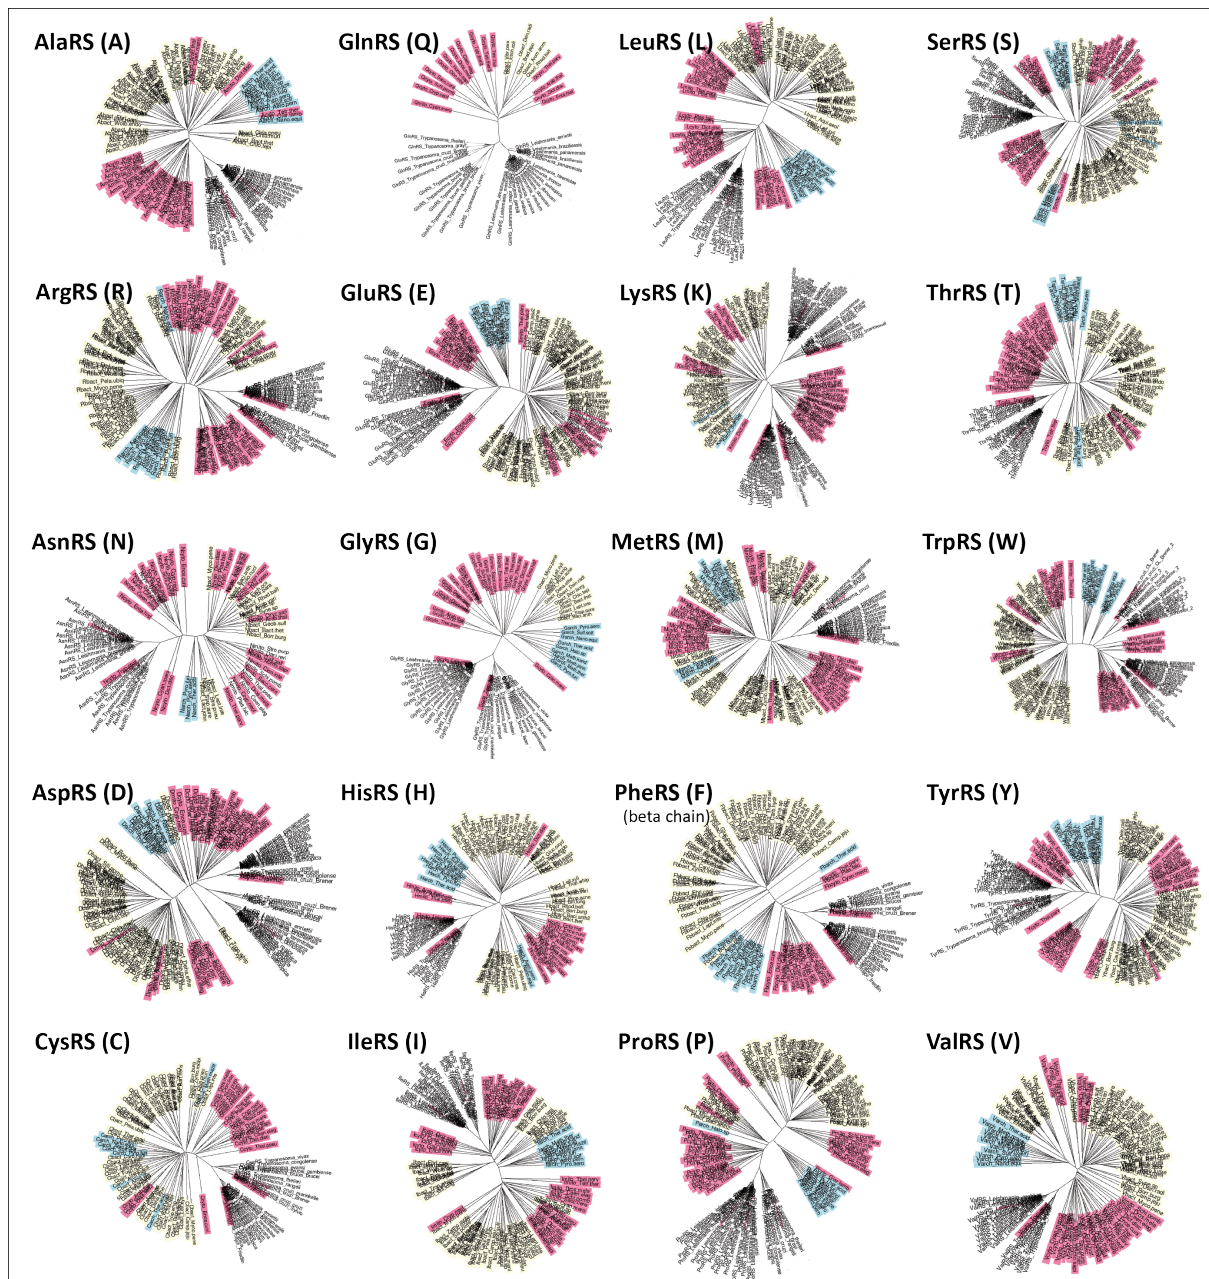

**Supporting Figure S3.** Schematic representation of downsized multiple sequence alignments of aaRS protein sequences that are clustered according to the phylogeny. The lengths indicated on the right correspond to the total number of positions for each alignment. Functional domains are boxed and named as followed: AC-BD stands for anticodon-binding domain; Cat-D for catalytic domain; WHEP-D refers to the helix-turn-helix domain found in TrpRS, HisRS, GluRS and ProRS; CP1 stands for Connective Polypeptide 1 and acts as an editing domain. tRNA-edge BD and tRNA-DB stand for tRNA-edge binding domain and tRNA binding domain, respectively. Catalytic residues (either HIGH and KMSKS or derivatives for class I aaRSs, or motifs 1, 2 and 3 for class II aaRSs) are positioned on the top of each MSA.

Supplementary Figure S3.

### CysRSs (Class I)

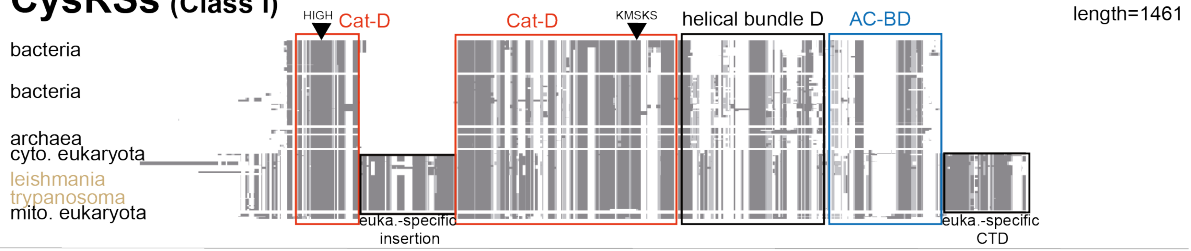

### GlnRSs (Class I)

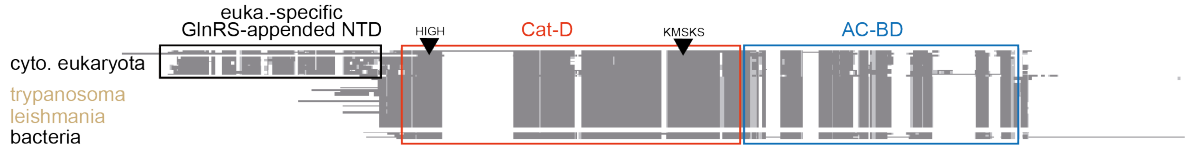

### LeuRSs (Class I)

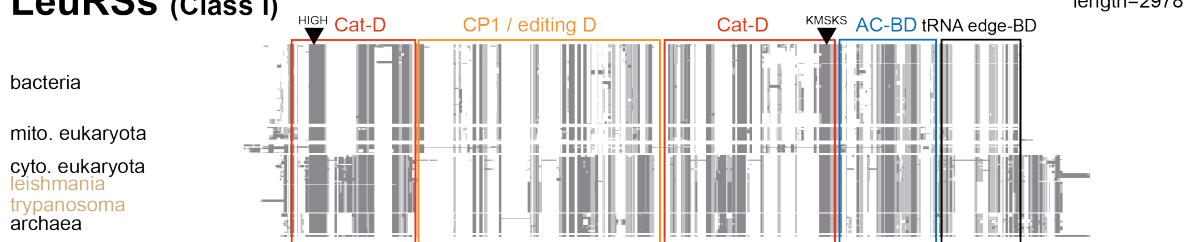

### ValRSs (Class I)

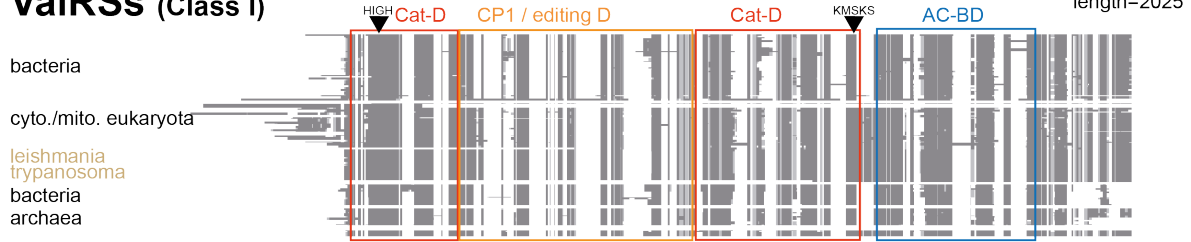

### AlaRSs (Class II)

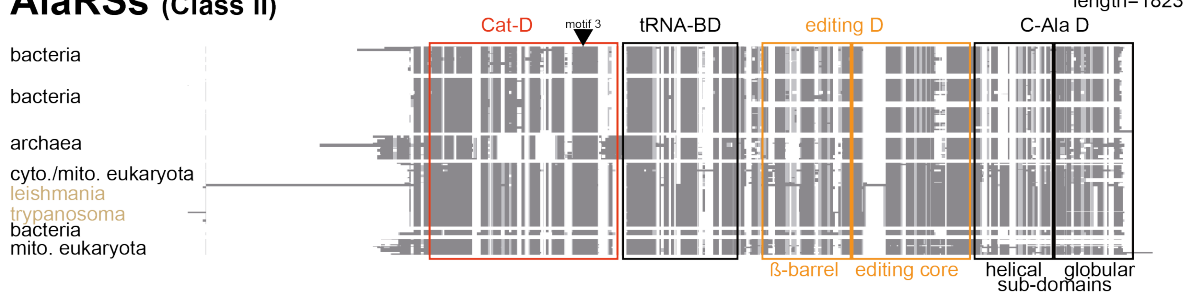

### GlyRSs (Class II)

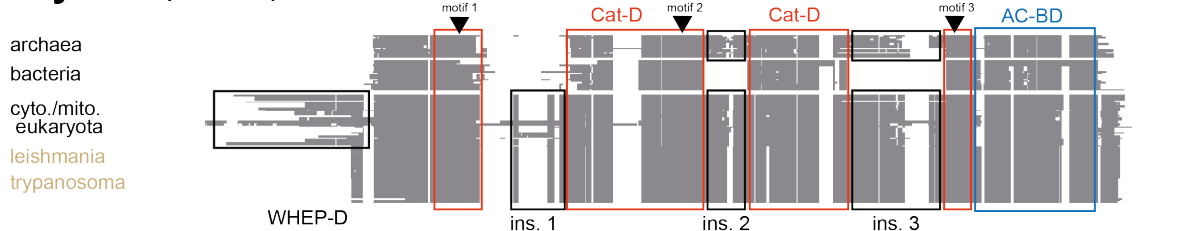

Supplementary Figure S3.

### SerRSs (Class II)

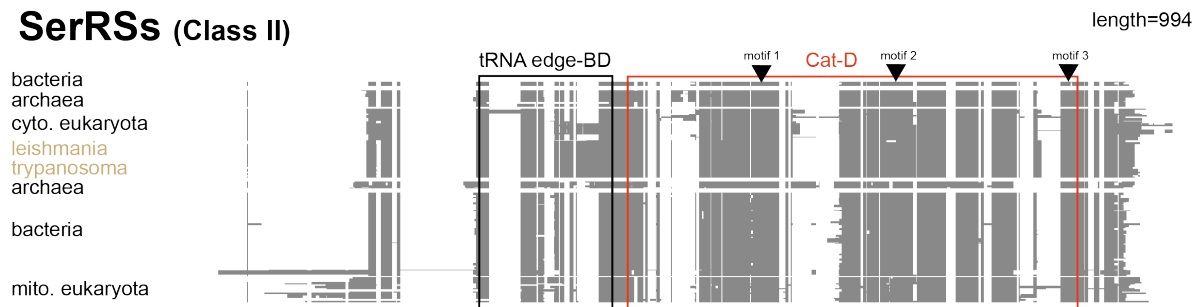

### PheRSs (alpha chain) (Class II)

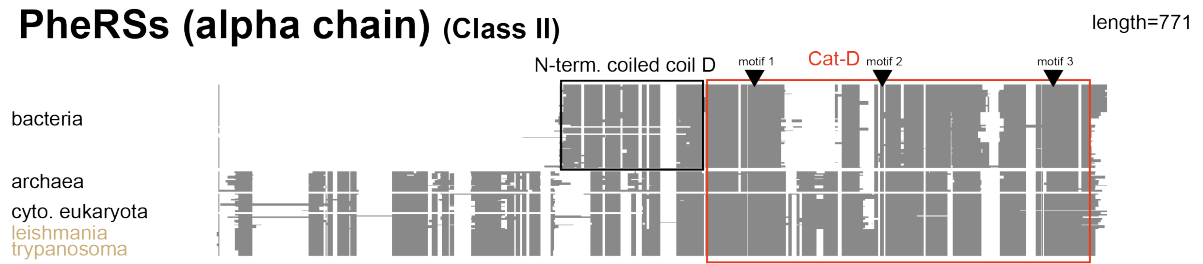

### PheRSs (beta chain) (Class II)

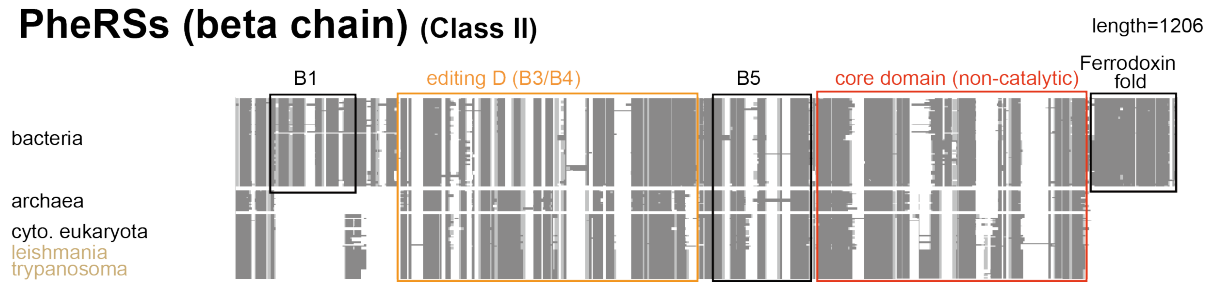

**Supporting Figure S4. RNA seq data for *L. tarentolae* GluRS and ThrRS with trypanosomatid-specific extension and insertions.** The gray panel is a schematic representation of the coverage obtained after basecalling and alignment of the reads to the reference genome (TriTrypDB-9.0\_LtarentolaeParrotTarII\_Genome, obtained from the TriTryp database {Aslett, 2010 #8383}). Only reads aligning with aaRS transcripts and containing the spliced leader sequence are selected. An orange arrow represents the leader sequence, and the purple and green boxes represent the 5' and 3' UTRs, respectively.

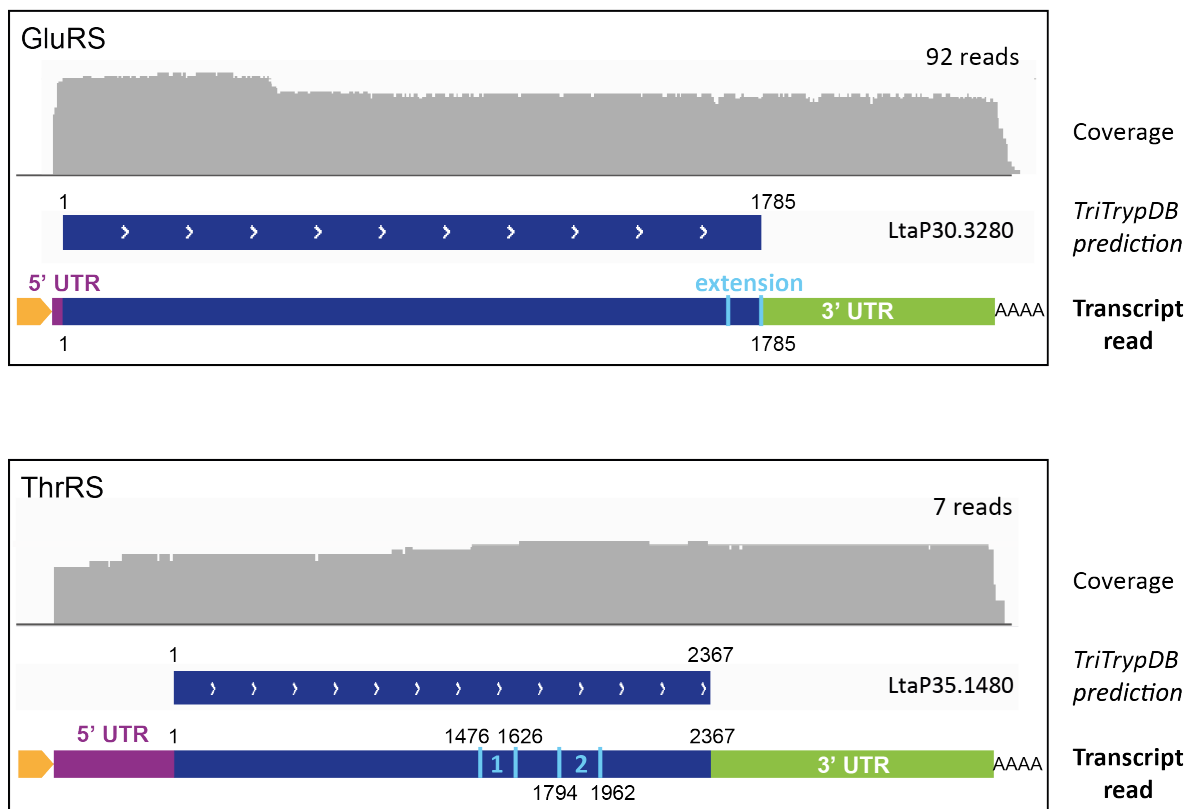

**Supporting Figure S5. ProRS sequences from *L. tarentolae*.** Regarding the ProRSs, two isoforms are encoded by distinct genes in *Leishmania* species (14). Full-length *L. tarentolae* ProRS sequences are however missing from the TriTryp database. Our RNA-sequencing data allowed us to identify a sequence coding for the mitochondrial isoform (see below). When inserted into the ProRS MSA, it appears that the corresponding protein sequence displays a N-terminal extension of 86 amino acid (see the blue part of the sequence below), similar to the 88 aa N-terminal extension found in the *L. Major* ProRS. This strongly suggests that a similar N-terminal extension (likely the MTS) is present in orthologs from other *leishmania* species.

**>ProRS\_L\_tarentolae\_mito (From our RNA Seq data)**

MQGRQILSQSHAFFSVLSNSVSFLSSSRLSYRPIVRHSCEQHCLLSYSPRTPSSLTRPAAPVTPTRGYXRSTI  
 YKQTKSQRIPLDNMSIEDCXGFDEVNLFHELGLDIPILHHDEKATVEEVLDLLQKKGINAAGTKTLFLKSK  
 KGELVMATAFKSTPTDLKFIQKVTNTKDLRFASNEVLQECLAVVQGCVTPLPLNNNXKEGRPITLLMDSSL  
 QSSTQPLAFCMCRNDYTAVITFEDLKKYFEKIGYTYKLVDFGAASADA AVTGGSAAPAPKPKKVSSEAAS  
 AKRGAAAGGAPATAQSGETKLGIAVKREENSSAWYIDVITKAEMIEYYDVSGCYIIRPWAYYYVWKCVR  
 FLGGQIEKLGVEDCYFPMFVSRGCLEREKDHIEGFAPEVAWVTRAGDTELEQPVAVRPTSETVMYPYYA  
 KWIRSHRDLPVRLNMWNNVIRWEFSHTPFIRTREFLWQEGHCAWAKAECAKEVLDILECYASVYEQ  
 LLAVPVVRGRKTEKEKFAGGDYTTTVETFIEAVGRGCQGATSHNLGQNFQKMFDIRFQDPENNEQTLIP  
 WQNSWGLSTRVIGVMIMVHGDNRGMVMPPRVASTQVIIIIPVGITKDTTEDARQELLASCRRLEGELRE  
 GGVRAKCDLRDNYS PGWRFNHWEVKGVPLRVELGPRELAERSLAVAVRHSGARHSVAWDAQTPVAV  
 AALLEDVQAQMYARAKATMETHRVRVTEWAEFVPTLNRKCLILAPWCGAMECEDQVKKDSAEESKAA  
 QAQETREDARAPSMGAKTLCIPFEQPEEPAEGHTCICKGCTKPATTWVLFGRSY

Regarding the cytosolic isoform of the ProRS, only a fragment of 486 aa is found in the TriTrypDB (LtaP29.2400) (which corresponds to the green part of the sequence below). Its insertion into the ProRS MSA showed that it corresponds to the C-terminal part of the protein but could not be a functional enzyme since catalytic residues are missing. RNA-sequencing data revealed a candidate sequence, however of incomplete reading (see below). We manually reconstructed a consensus sequence for the *L. tarentolae* cytosolic ProRS (supplementary Figure S4), using the very high sequence conservation observed in the alignment between the cytosolic ProRSs from kinetoplastids.

**>ProRS\_L\_tarentolae\_cyto\_incomplete (from RNA Seq data)**

MSAKDCKGPELLAXLKELNIXXPTISHGEMHTVEEANRELGRFGTPCMGTKNMFXXSKKGELVLLTAVH  
 TTKTDMXXIEKAAGVXNLRFPAGEXLSEXLAVVQGCVTFPALINNIXQHNIIVLXDKNLKESPIPXALHPCR  
 XDKSSLIIFEQLERFLEKIGYXYKLVXFGAPSADA AVTGGSAALAPAAPAPKPKKVSSEAASAKRGAXCWC  
 ACDCTVWRDEARHRGEARGELFCVVHRCDEGGDDRVLRRVRLHYPSLGILRVEVRAAVSXGRSRLA  
 WRTATXCS CPRXCLEREKDHIEGFAPEVAWVTRAXDTELEQPVAVRPTSETVMXPHYAKWIRSHRDLP

VRLNMWNNVIRWEFSHPTPFIRTREFLWQEGTARGRRRSARRRCWTSWSAMRLCTSSFWRWCA  
GARRRRSSLAGTTRRRWRRSLRLLGAGARARRATTWGQNFQKMXDIRFQDPENNEQTLIPWQNSW  
GLSTRVIGVMIMVHGDNRGMVMPPRVASTQVIIIIPVGITKDTTEDARQELLASCRRLEGELEGGVRR  
VRPARQLQPRVAVQPLGSXXACXLRVELGPRELXERSLAVAVRXSGARHSXAWDAQTPXAVAAALLEXV  
QAQMYARAKATMETHRXXVTEWAEFVPTLNRKCLIXAPWCGAMECEDQVKKDSAEESKXAQAQETR  
EDARAPSMGAKTLCIPFEQPXXXVEGHTCICKGCXKPATTWVLFGRSY

**>ProRS\_L\_tarentolae\_cyto\_proposed sequence**

MSAKDCKGPELLAVLKELNIELPTISHGEMHTVEEANRELGRFGTPCMGTKNMFLKSKKGELVLLTAVH  
TTKTDMLHAIEKAAGTRNLRFAEILSENLAVVQGCVTPFALINNIKHNIIVLLDKNLKEPIPFALHPCR  
DKSSLIIFEQLERFLEKIGYAYKLVDFGAPSADAAVTGGAAAPAPKPKKVSSEAASAKRGGGAAAAAP  
APSGETKLGIAARRENFSAWYIDVITKAE MIEYYDVS GCYIIRPWAYYVWKCVRFLGGQIEKLGVEDCY  
FPMFVSRGCLEREKDHIEGFAPEVAWVTRAGDTELEQPVAVRPTSETVMYPYAKWIRSHRDLPVRLN  
MWNNVIRWEFSHPTPFIRTREFLWQEGHCAWAKAECAKEVLDILECYASVYEQLLAVPVVRGRKTEKE  
KFAGGDYTTTVETFIEAVGRGCQGATSHNLGQNFQKMFDIRFQDPENNEQTLIPWQNSWGLSTRVIGV  
MIMVHGDNRGMVMPPRVASTQVIIIIPVGITKDTTEDARQELLASCRRLEGELEGGVRAKCDLRDNYS  
GWRFNHWEVKGVPLRVELGPRELAERSLAVAVRHSGARHSVAWDAQTPVAVAAALLEDVQAQMYARA  
KATMETHRVRVTEWAEFVPTLNRKCLILAPWCGAMECEDQVKKDSAEESKAAQAQETREDARAPSMG  
AKTLCIPFEQPEPVEGHTCICKGCTKPATTWVLFGRSY

XXX = reconstructed based on conservation on the alignment

XXXX = corresponds to LtaP29.2400 from the TriTrypDB
